1

2 **Title:** Mitochondria induce anisotropy and delays in action potential conduction

3

4 **Running Title:** Impact of mitochondria on action potential propagation

5

6 **Authors:** Ann Castelfranco <sup>1</sup> and Pepe Alcami <sup>2,3\*</sup>

7

8

9

10 <sup>1</sup> Békésy Laboratory of Neurobiology, Pacific Biosciences Research Center, University of  
11 Hawai'i at Manoa, 1993 East–West Rd., Honolulu, HI 96822, USA.

12

13 <sup>2</sup> Division of Neuroscience, Faculty of Biology, Ludwig-Maximilians-Universität München,  
14 Grosshaderner Strasse 2, 82152 Planegg - Martinsried, Germany.

15

16 <sup>3</sup> Max Planck Institute for Biological Intelligence, Eberhard-Gwinner-Straße, 82319 Starnberg,  
17 Germany.

18

19 \* correspondence should be addressed to Pepe Alcami ([alcami@bio.lmu.de](mailto:alcami@bio.lmu.de)).

20

21 **Author contributions:** AC conceptualized the model, performed simulations, wrote the  
22 manuscript. PA conceptualized the experiments and the model, performed experiments,  
23 analyzed data, wrote the manuscript.

24

25 **Keywords:** axon, mitochondria, action potential, conduction velocity, cable, latency, songbird,  
26 HVC, RA, premotor circuits.

27

28 The authors declare no conflict of interest.

29

30 **Acknowledgments:** We thank Manfred Gahr for support and feedback throughout the study.  
31 We are thankful to Marianne Braun for the processing of samples for electron microscopy and

32 advice throughout the course of this study, and animal caretakers at the Max Planck Institute  
33 for Ornithology for excellent care of canaries. We thank Wiebke Möbius and Moritz Hertel for  
34 advice on perfusions.

35

## 36 **Abstract**

37 The internal resistance of axons to ionic current flow affects the speed of action potential  
38 propagation. As biological cables, axons contain mitochondria which are necessary to support  
39 axonal function with energy supply. Although we would expect mitochondria to increase the  
40 internal resistance to current flow, their impact on the conduction velocity of action potentials  
41 has remained elusive. To investigate the impact of mitochondria on action potential  
42 propagation in the small non-myelinated fibers found in the vertebrate brain, we combined  
43 computational modeling and electron microscopy from the axons found in the premotor  
44 pathway that controls the production of birdsong with submillisecond precision. Mitochondria  
45 occupancy of axonal cross-sections ranged from 5 to 73% (average: 29%) in the ~ 0.2-0.7  $\mu\text{m}$   
46 diameter non-myelinated axons connecting song premotor nuclei HVC and RA in canaries.  
47 Interestingly, this occupancy depends on axonal diameter: axonal cross-section occupancy  
48 by mitochondria was larger in small axons, with an average occupancy of ~46% for axons  
49 with diameters smaller than 300 nm and ~21% for larger diameters. Computational modeling  
50 showed that when the propagating action potential meets a mitochondrion, the conduction  
51 velocity decreases and the action potential is delayed by tenths of microseconds to  
52 microseconds. This effect is stronger in small axons given their larger cross section  
53 mitochondrial occupancy and cumulates delays of tenths of milliseconds along the whole  
54 pathway linking HVC and RA. Finally, we modeled the impact of varying densities of  
55 mitochondria on action potential propagation along the songbird premotor pathway. In  
56 summary, our model shows that axonal mitochondria induce the anisotropic propagation of  
57 action potentials, and that this effect cumulates a typical delay in the order of tenths of  
58 milliseconds over distances of mms. By partially occupying axoplasm, mitochondria constitute  
59 a biological design constraint that delays information processing in the small-diameter  
60 unmyelinated axons found in the vertebrate brain.

61

## 62 **Materials and methods**

## 63 **Animals**

64 Three adult male canaries (*Serinus canaria*) housed in outdoor aviaries at the Max Planck  
65 Institute for Ornithology (Seewiesen) were euthanized by an overdose of isoflurane (two for  
66 electron microscopy and one for light microscopy). Housing, welfare of the animals and  
67 experimental procedures complied with the requirements of the European Directives for the  
68 protection of animals used for scientific purposes 2010/63/EU of the European parliament,  
69 the German 'Verordnung zum Schutz von zu Versuchszwecken oder zu anderen  
70 wissenschaftlichen Zwecken verwendeten Tiere' and the German Animal Protection Act.

## 71 **Fixation**

72 *For electron microscopy.* After death had been confirmed, animals underwent intracardiac  
73 perfusion for 2 minutes with a PBS solution containing sodium nitroprusside (VWR chemicals,  
74 10µg/ml) followed by 20 minutes with a 'Karlsson-Schultz' perfusion solution containing 4%  
75 formaldehyde (Carl Roth Art.Nr. 0335), 2.5% glutaraldehyde (Electron Microscopy Sciences,  
76 cat.# E16220), 0.5% NaCl in phosphate buffer adjusted to pH 7.4 (Möbius et al. 2010).  
77 Perfusion speed was 1ml/min. Brains were postfixed for 24h.

78 *For light microscopy.* After death had been confirmed, the canary underwent intracardiac  
79 perfusion for 2 minutes with a PBS solution containing sodium nitroprusside (VWR chemicals,  
80 10µg/ml) followed by 20 minutes with a perfusion solution containing 4% formaldehyde (Carl  
81 Roth Art.Nr. 0335) in PBS. Perfusion speed was 1ml/min. The brain was postfixed for 24h.

## 82 **Electron microscopy**

83 *Vibratome sections.* Sagittal sections 100 µm to 300 µm thick were sliced with a vibratome  
84 (Leica VT1200S). Sections approximately 1 µm by 1 µm isolated from the region containing  
85 bundles that exit the nucleus HVC in the direction of RA were further processed for electron  
86 microscopy.

87 *Osmification.* Osmification was performed with 1% Osmium Tetroxide (2% Osmium Tetroxide,  
88 Electron Microscopy Sciences, cat.#19152) in 0.1M Sodium Cacodylate pH 7.4 (Sodium  
89 Cacodylate buffer 0.2 M, Electron Microscopy Sciences, cat.#11653), for 40 min.

90 *Dehydration.* Osmification was followed by 3 rounds of washing in distilled water and  
91 dehydration in successive steps, each of 10 minutes, in 30%, 50%, 70%, 100% Ethanol for 10  
92 minutes. Samples were embedded in Spurr's low viscosity embedding medium (Electron  
93 Microscopy Sciences, cat.#14300) according to the manual

94 (<https://www.emsdiasum.com/docs/technical/datasheet/14300>) for 48h at 60 °C.

95 *Semi-thin sections.* Slices were cut at 0.5 µm thickness with the ultramicrotome EM UC6  
96 (Leica) and stained with epoxy tissue stain (Electron Microscopy Sciences, cat.#14950).

97 *Ultra-thin sections.* Slices were cut at 60 nm thickness with ultramicrotome EM UC6 (Leica).

98 *Contrast counterstain.* Sections were stained with ‘ultrastainer’ (Leica) with 0.5% uranyl  
99 acetate (Uranyl acetate solution 1%, Electron Microscopy Sciences, cat.#22400-1) and 3%  
100 lead citrate (Ultrastain 2, Leica).

101 *Image acquisition.* Images were acquired with a JEOL (JEM-1230) transmission electron  
102 microscope and a Gatan Orius SC1000 digital Camera with the software Gatan  
103 DigitalMicrograph™.

104 *Image analysis.* Quantifications were performed on magnifications of 40.000 to 80.000 from  
105 axon bundles between HVC and RA. Images were analyzed with ImageJ software  
106 (<https://imagej.net/software/fiji/>) and Igor pro software (<https://www.wavemetrics.com/>). We  
107 fitted the axons and mitochondria to ellipses with ImageJ built-in plugin. Occupancy of axonal  
108 cross-sections by mitochondria was measured as the ratio of the area estimated from a disk  
109 whose diameter was set to the minor axis of an ellipse fitted to the mitochondrion to that  
110 analogously estimated for the corresponding axon. In three axon cross sections we found two  
111 mitochondria. These were excluded from the mitochondria to axon ratio calculations based on  
112 the ellipse fits.

113 The total volumetric occupancy was estimated from the measurement of the volume occupied  
114 by non-myelinated axons inside a bundle in longitudinal sections of bundles. Large fractions  
115 of extracellular space found in the bundle were deducted from this volume.

## 116 **Confocal microscopy**

117 *Vibratome sections.* Brain sagittal sections 60 µm thick were sliced with a vibratome (Leica  
118 VT1200S).

119 *Immunostaining.* A sagittal slice containing nuclei HVC and RA was incubated in a blocking  
120 solution (BS) containing bovine 1% serum albumin (weight/volume), 0.1% saponin and 1%  
121 tritonX-100 in PBS at room temperature for 1h. The slice was then incubated with the primary  
122 antibody against the Neurofilament heavy chain, NFH (Abcam ab4680, chicken polyclonal  
123 IgY, dilution 1:400 in BS) at 4°C for 48h, washed four times in BS at room temperature, and  
124 incubated in AMCA anti-chicken secondary antibody (Dianova, 703-156-155, dilution 1:200 in

125 BS) at 4°C for 24h, washed once in BS and three times in PBS and mounted in Vectashield  
126 mounting medium.

### 127 *Image acquisition.*

128 Acquisitions were performed at the Center for Advanced Light Microscopy (LMU) with a Ti-E  
129 Nikon spinning disk microscope equipped with a CFI Apochromat LWD Lambda S 40XC WI  
130 objective and an Andor iXon Ultra 888 EMCCD camera. The fluorochrome was visualized with  
131 an excitation wavelength of 405 nm (emission filter 420-460nm). Images were acquired with a  
132 pixel size of 326 nm and averaging four planes.

### 133 **Computational modeling**

134 Models for the unmyelinated axons of HVC projection neurons that run in bundles to the  
135 premotor nucleus RA (HVC<sub>RA</sub> cells) in canaries were simulated using the NEURON simulation  
136 environment (version 7.4) (Carnevale and Hines 2006; Hines and Carnevale 1997). Based on  
137 the morphology of these axons, the simple ball and stick model neuron consisted of a  
138 spherical soma 6 μm in diameter with a single cylindrical axon less than 1 μm in diameter.  
139 Simulated axon diameters ranged from 0.1 μm to 0.7 μm, in agreement with experimental  
140 measurements reported here. The soma contained only a passive leak conductance while the  
141 axons contained fast sodium and delayed rectifier potassium conductances in addition to the  
142 leak conductance. The descriptions of the ion channel kinetics were taken from the model for  
143 mammalian neocortical pyramidal axons of (Cohen et al. 2020) available from the ModelDB  
144 database (<https://senselab.med.yale.edu/ModelDB/showmodel?model=260967>). The fast  
145 sodium channel has the 8-state kinetic gating scheme of (Schmidt-Hieber and Bischofberger  
146 2010). The potassium channel kinetics were described using the Hodgkin-Huxley formalism  
147 (Hodgkin and Huxley 1952) for a non-inactivating potassium channel with parameters based  
148 on a Kv1.1 subunit (Akemann and Knöpfel 2006). The ion channel densities were set to 1000  
149 pS/cm<sup>2</sup> for the sodium channel and 3000 pS/cm<sup>2</sup> for the potassium channel and were uniform  
150 along the axon. These channel densities were chosen to fit the amplitude of an action  
151 potential recorded from a canary HVC<sub>RA</sub> cell at 20 °C (unpublished observation) and the range  
152 of conduction delays measured from HVC to the RA along axons putatively identified as  
153 unmyelinated (Hahnloser, Kozhevnikov, and Fee 2006; Egger et al. 2020). The simulations  
154 were run at 40 °C according to physiological canary body temperatures. The cytoplasmic  
155 resistivity of the axon without mitochondria was set to 100 Ωcm, while that of the sections

156 containing a mitochondrion was varied to model the effect of the mitochondrion (see Results).  
157 For all sections, the specific membrane capacitance was set to  $1\mu\text{F}/\text{cm}^2$ , and the reversal  
158 potential of the leak current to  $-70\text{ mV}$ .

159 The axon was made up of two types of sections: those containing a mitochondrion and  
160 those with just axoplasm. Generally, the mitochondrion-containing compartments were  $1\mu\text{m}$   
161 in length and were distributed uniformly along the axon. The effect of varying the length and  
162 distribution of the mitochondrial compartments on the average computed action potential  
163 conduction velocity was usually small as long as the “total amount” of mitochondria in the  
164 axon remained fixed. In particular, when the  $1\mu\text{m}$  mitochondrion compartments were  
165 distributed randomly instead of uniformly, the relative difference in the conduction velocity  
166 was less than 0.2%. However, in the extreme case when very large mitochondria were  
167 collected in one long compartment, the relative change in conduction velocity was  $\sim 11\%$ .  
168 Conduction velocity was computed from the difference between the times when the action  
169 potential upswing crossed  $-5\text{ mV}$  at two positions near the middle of the axon separated by a  
170 known distance, typically  $200\mu\text{m}$ . The time when the membrane potential crossed  $-5\text{ mV}$  was  
171 interpolated from the times of adjacent points on the voltage trajectory spanning  $-5\text{ mV}$ . To  
172 compute the local effect on conduction velocity of a single mitochondrion the simulation was  
173 run with all axon compartments containing mitochondria.

174 The simulations used NEURON’s default backward Euler integration with a time step  
175 size of  $2.5\mu\text{s}$ . The soma was subdivided into  $2\mu\text{m}$  compartments; the spatial grid for the  
176 axon was finer, typically  $0.33\mu\text{m}$  and  $0.82\mu\text{m}$  compartments for axon sections with and  
177 without mitochondria, respectively. A 3-fold increase in the fineness of the spatial grid  
178 resulted in a relative change in the conduction velocity of less than 0.01%. Action potentials  
179 were elicited by a  $0.5\text{ ms}$  duration  $0.5\text{ nA}$  current pulse to the soma following a  $10\text{ ms}$  delay to  
180 allow any membrane voltage transients to settle back to the resting membrane potential.

181

## 182 **Introduction**

183 The timely propagation of action potentials requires the fine tuning of axonal biophysical  
184 properties to ensure the correct functioning of neural circuits (Rushton 1951; Deutsch 1969;  
185 Seidl, Rubel, and Harris 2010; Castelfranco and Hartline 2015; Alcami and El Hady 2019). A  
186 fundamental functional property of action potential propagation, conduction velocity, depends

187 on the morphological and physiological properties of axons and, when myelinated, of their  
188 myelinating cells. Axonal morphology constrains the passive properties of axons, a  
189 phenomenon that is today well understood (Manor, Koch, and Segev 1991; Ofer, Shefi, and  
190 Yaari 2020). However, a property of biological cables, and its impact on conduction speed,  
191 has remained elusive: the presence of intracellular organelles. One such prevalent organelle  
192 found in axons are mitochondria.

193 In comparison to non-biological cables, biological cables such as axons require the  
194 supply of energy all along the cable to maintain their function (Perge et al. 2009; Harris and  
195 Attwell 2012; Sterling and Laughlin 2015). Mitochondria provide axons with energy, required  
196 among others to maintain resting potentials and propagate action potentials, housekeeping  
197 and synaptic functions (Harris and Attwell 2012). By occupying intracellular volume, we would  
198 expect that mitochondria reduce cytosolic cross-sectional area and thereby increase the axial  
199 resistance to current flow and the conduction velocity of propagating action potentials.  
200 However, their impact on action potential propagation remains elusive, and axons have so far  
201 been modeled as cables without organelles (Meunier and Segev 2001).

202 In this article, we investigate the impact of mitochondria on action potential conduction  
203 velocity in the characteristic small unmyelinated axons found in vertebrate brains, with  
204 diameters in the range of hundreds of nanometers (Perge et al. 2009; Braitenberg 1991;  
205 Wang et al. 2008), i.e. (Braitenberg 1991) measured an average axonal diameter below 0.3  
206  $\mu\text{m}$  in the mammalian neocortex, and (Aboitiz et al. 1992) found corpus callosum  
207 unmyelinated axon diameters to be in the range of 0.1 to 1  $\mu\text{m}$ . We focus on the premotor  
208 pathway involved in the fast control of vocal muscles that produce birdsong, that is, the axons  
209 belonging to the principal cells of the song nucleus HVC (formerly known as 'high vocal  
210 center', used here as proper name) that project to the RA (robust nucleus of the arcopallium),  
211 the  $\text{HVC}_{\text{RA}}$  cells.  $\text{HVC}_{\text{RA}}$  cells fire action potentials with submillisecond precision and in high-  
212 frequency bursts during singing (Hahnloser, Kozhevnikov, and Fee 2002). Thus, this  
213 pathway is a model of choice to investigate delays in action potential propagation that could  
214 be induced by mitochondria.

215

## 216 **Results**

### 217 **Mitochondrial occupancy of unmyelinated axons depends on axonal diameter**



218 We examined with transmission electron microscopy the pathway connecting the two  
219 premotor regions, the 'song nuclei' involved in birdsong production, HVC and RA (Fig. 1A) in  
220 the canary (*Serinus canaria*). This motor pathway is formed by a mixture of myelinated and  
221 unmyelinated axons, spatially clustered together in axon bundles (Fig. 1B).

222 We measured the fraction of the non-myelinated axonal cross-sectional area occupied  
223 by a mitochondrion from mitochondrion-containing axonal radial sections, which we termed  
224 the “cross-sectional mitochondrial occupancy” of the axon. Representative examples of axons  
225 of different sizes are shown in Fig. 1C. The cross-sectional mitochondrial occupancy ranged  
226 from 5.2% to 69.3% (Figure 1D1), with an average of  $26.4 \pm 1.8\%$  ( $n = 69$  cross-sections of  
227 axons containing mitochondria from two canaries). Alternatively, we fitted ellipses to  
228 mitochondria and axons and calculated areas based on the minor axis of the ellipse,  
229 assuming the axons were cylindrical, correcting for planes not perfectly orthogonal to axon  
230 bundles (Harris and Attwell 2012). This quantification gave similar results, with fractions  
231 ranging from 4.8% to 72.5% and averaging  $29.1 \pm 2.3\%$  (Fig. 1D2).

232 Non-myelinated axon diameters spanned the range from 166 nm to 724 nm ( $n = 66$ ),  
233 averaging  $394 \pm 17$  nm. In order to examine whether cross-sectional mitochondrial occupancy  
234 varied depending on axon diameter, we plotted it as a function of axon diameter (Fig.1D2).  
235 Interestingly, cross-sectional mitochondrial occupancy, both calculated from area  
236 measurements on electron micrographs and based on ellipse fits, showed a negative  
237 correlation with axon area and diameter (Fig. 1D1-D2, linear correlation test,  $p = 9 \cdot 10^{-8}$ ,  $r =$   
238  $0.59$ ; and  $p = 3 \cdot 10^{-9}$ ,  $r = -0.65$  respectively). That is, a larger fraction of the axon cross-section  
239 was covered in small axons relative to larger axons. Whereas on average mitochondrial  
240 occupancy accounted for 46.2% of the axon cross-section (by the fitted ellipse method) for  
241 axons up to 300 nm in diameter, this fraction decreased to 21.2% for axons larger than 300  
242 nm in diameter.

243 These results suggested little or no scaling of mitochondria with axon size. Indeed, we  
244 confirmed that the distributions of mitochondria and axon diameters showed a small  
245 correlation (Fig.1E), which could be fitted by a linear function with slope 0.163 ( $p = 0.0001$ ,  $r =$   
246  $0.43$ ).



247

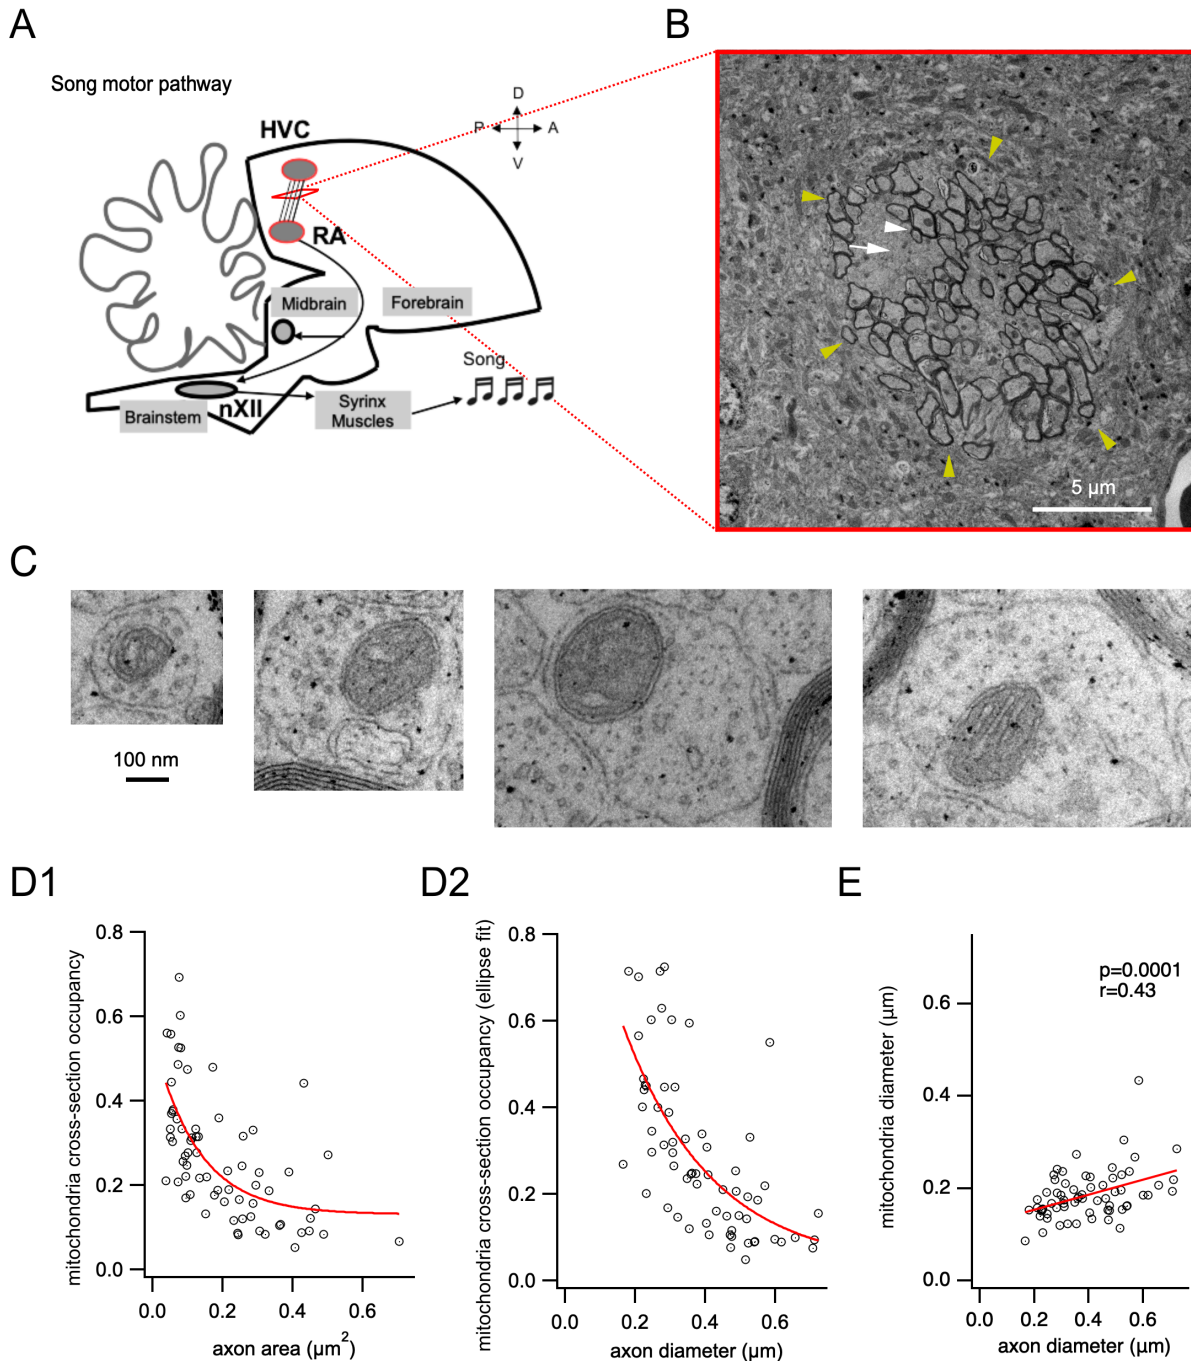

248 **Figure 1. Mitochondria occupancy of unmyelinated axonal cross-sections between**  
 249 **nuclei HVC and RA decreases with axon diameter.** **A.** Schematic representation of the  
 250 axons running between HVC and RA in the song motor pathway. The song motor pathway  
 251 controlling birdsong production originates in HVC within the nidopallium, continues in  
 252 downstream nucleus RA in the arcopallium, whose neurons project onto nucleus nXII in the  
 253 brainstem, which in turn projects to the vocal muscles that form the songbird vocal organ, the  
 254 syrinx. Modified from (Alcami et al. 2021). **B.** Example of axon bundle (yellow arrows) formed  
 255 by axons from the pathway between HVC and RA. Axons comprise myelinated axons (white  
 256 arrowhead) and unmyelinated axons (white arrow). **C.** Representative examples of axonal

257 cross-sections of different sizes containing mitochondria, imaged with transmission electron  
258 microscopy. **D1.** Occupancy of axonal cross-sections by mitochondria, measured as the ratio  
259 of mitochondrial to axonal areas, plotted as a function of measured axon area. An exponential  
260 fit of the data is shown in red. **D2.** Occupancy of axonal cross-sections by mitochondria,  
261 measured as the ratio of the area estimated from a disk whose diameter was set to the minor  
262 axis of an ellipse fitted to the mitochondrion to that analogously estimated for the  
263 corresponding axon, as a function of axon diameter. An exponential fit of the data is shown in  
264 red. **E.** Mitochondrion diameter plotted as a function of axon diameter. A linear fit of the data is  
265 plotted in red. The  $p$  and  $r$  values from a linear correlation test are indicated.  
266

## 267 **Model for mitochondrion-containing axonal sections**

268 To model the impact of a mitochondrion on conduction velocity, we made the  
269 simplifying assumption that the mitochondrion acts like a region of high resistance to axial  
270 current flow. Consider a section of an axon that contains a cylindrical mitochondrion. Since  
271 the mitochondrion doesn't completely fill the cross-section of the axon, there are two current  
272 paths through the core of the cylindrical axon section: one passes through the cytoplasm  
273 avoiding the mitochondrion and the other passes through the mitochondrion (Fig. 2C1). This  
274 can be described by a circuit with two impedances in parallel, which can be approximated  
275 (Padmaraj et al. 2014) by two resistors in parallel, where  $r_{ax}$  ( $\Omega$ ) is the resistance of the path  
276 through the cytoplasm and  $r_{mit}$  ( $\Omega$ ) is the resistance of the path through the mitochondrion  
277 (Figure 2C2). These resistances can be replaced by an equivalent resistance  $r_{eq}$  given by:

$$278 \quad r_{eq} = r_{ax} r_{mit} / (r_{ax} + r_{mit}) \text{ [Equation 1]}$$

279 Rewriting the equivalent resistance,  $r_{eq}$ , in terms of the intracellular resistivity,  $R_{eq}$  ( $\Omega$  cm),  
280 gives:

$$281 \quad r_{eq} = R_{eq} L / A \text{ [Equation 2]},$$

282 where  $A$  is the cross-sectional area of the cylindrical axon and  $L$  is the length of the section  
283 containing the mitochondrion, which we define to be the length of the mitochondrion.

284 The cross-sectional area,  $A$ , can be partitioned into the area taken up by the mitochondrion,  
285  $A_{mit}$  and the area free from the mitochondrion,  $A_{ax}$ .

286 Let  $p$  be the proportion of  $A$  that is taken up by the mitochondrion, then:

$$287 \quad A_{mit} = pA \text{ and } A_{ax} = (1-p)A \text{ [Equation 3]}$$

288 Combining equations 2 and 3 gives:

$$289 \quad r_{ax} = R_{ax} L / (1-p)A \text{ [Equation 4]},$$

290 where  $R_{ax}$  is the cytoplasmic resistivity of the axon and similarly,

291  $r_{mit} = R_{mit}L/pA$  [Equation 5]

292 Hence, combining equations 1, 4 and 5, the equivalent resistivity of the section is:

293  $R_{eq} = R_{ax}R_{mit}/(pR_{ax} + (1-p)R_{mit})$  [Equation 6]

294 Thus, given estimates for the intracellular resistivity of the axon and the resistivity of a  
295 mitochondrion, we can estimate the combined resistivity in terms of the cross-sectional  
296 mitochondrial occupancy.

297 The resistivity of a mitochondrion is not a particularly well-defined quantity, but we can  
298 make a rough estimate for a model cylindrical mitochondrion 0.2  $\mu\text{m}$  in diameter (Fig. 1E) and  
299 1  $\mu\text{m}$  in length. If we assume that the resistance across a unit area of mitochondrial outer  
300 membrane is similar to that of the axolemma, on the order of  $10^4 \Omega\text{cm}^2$ , then for a cylindrical  
301 mitochondrion 0.2  $\mu\text{m}$  in diameter the membrane resistance per unit length is  $\sim 1.6 \times 10^8 \Omega\text{cm}$   
302 (Jack, Noble, and Tsien 1975). So the resistance of a 1  $\mu\text{m}$  long mitochondrion is  $\sim 1.6 \times 10^{12} \Omega$ .  
303 Thus the resistivity of the model mitochondrion is approximately 5  $\text{M}\Omega\text{cm}$ . This is a crude  
304 estimate that ignores much of the structure of the mitochondrion. However, (Jonas,  
305 Buchanan, and Kaczmarek 1999) using a patch clamp technique to record from mitochondria  
306 in the presynaptic terminal of the squid found only a small conductance of  $\sim 28\text{pS}$  in the  
307 quiescent terminal. This corresponds to a membrane resistance of  $\sim 4 \times 10^{10} \Omega$  for the patch. In  
308 order to use this resistance to estimate the resistivity, we need the dimensions of the resistor.  
309 The diameter of the tip of the patch electrode was  $\sim 0.2 \mu\text{m}$ , but whether the recording was  
310 from the surface of the mitochondrion or extended to inner membranes was unclear.  
311 Assuming that this thickness was at most 1  $\mu\text{m}$ , although likely to be much less, this gives an  
312 estimated resistivity of at least  $\sim 10^5 \Omega\text{cm}$ . Hence, for the the model, we used the conservative  
313 estimate of  $10^4 \Omega\text{cm}$  for the resistivity of a mitochondrion and 100  $\Omega\text{cm}$  for the intracellular  
314 resistivity of the axon.

315

### 316 **Mitochondria induce a local decrease in action potential conduction velocity**

317 We used the computational model to investigate the impact of the cross-sectional  
318 mitochondrial occupancy on action potential propagation in unmyelinated axons. Since  
319 conduction velocity (Hodgkin and Huxley 1952) and cross-sectional mitochondrial occupancy  
320 (Fig.1) depend on axon diameter, we simulated action potential propagation for different axon  
321 diameters. We first explored the local effect of a single mitochondrion on conduction velocity.

322 In order to measure mitochondrial length on the longitudinal axis, we prepared  
323 longitudinal sections from axon bundles (Fig. 2. A, B1). The longitudinal length of a  
324 mitochondrion ranged from 242 to 1882 nm measured as the major axis from an ellipse  
325 (average:  $622 \pm 38$  nm,  $n = 55$ , Fig. 2B2). Thus we report the local impact of a mitochondrion  
326 on action potential conduction for a typical mitochondrion length of  $0.6 \mu\text{m}$  (Fig.3A,B).

327 We compared the conduction velocity of an action potential propagating along the  
328 membrane of a  $0.6 \mu\text{m}$  long cylindrical axon containing a mitochondrion (Fig. 2C1, D) with  
329 that of the same model axon devoid of mitochondria. Local conduction velocity decreased  
330 with increasing mitochondrial occupancy and decreasing axon diameter. For different typical  
331 cross-sectional occupancies and axon diameters, conduction velocity decreased by  $\sim 0.11$   
332 m/s (36%) for small  $0.2 \mu\text{m}$ -diameter axons with 60% cross-sectional occupancy, by  $\sim 0.06$   
333 m/s (13%) for medium  $0.4 \mu\text{m}$ -diameter axons with 25% cross-sectional occupancy and by  $\sim$   
334  $0.04$  m/s (8%) for larger  $0.6 \mu\text{m}$ -diameter axons with 15% cross-sectional occupancy. Thus,  
335 smaller axons are more susceptible to a decrease of conduction velocity induced by  
336 mitochondria.

337 We then computed the additional propagation delay through the mitochondrion-  
338 containing section for different axon diameters (Fig. 2E). Conduction delay increased with  
339 increasing mitochondrial occupancy and decreasing axon diameter. For typical cross-  
340 sectional mitochondrial occupancy in the measured biological range (Fig. 1), the additional  
341 delay caused by a single mitochondrion was  $\sim 1.1 \mu\text{s}$  for small  $0.2 \mu\text{m}$ -diameter axons with  
342 60% cross-sectional occupancy,  $\sim 0.2 \mu\text{s}$  for medium  $0.4 \mu\text{m}$ -diameter axons with 25% cross-  
343 sectional occupancy and  $\sim 0.1 \mu\text{s}$  for larger  $0.6 \mu\text{m}$ -diameter axons with 15% cross-sectional  
344 occupancy.

345 Although conduction velocity for a given cross-sectional mitochondrial occupancy was  
346 larger for larger diameter axons (Fig. 2D), the relative decrement in velocity due to cross-  
347 sectional mitochondrial occupancy was the same for different axon diameters (Fig. 2F).

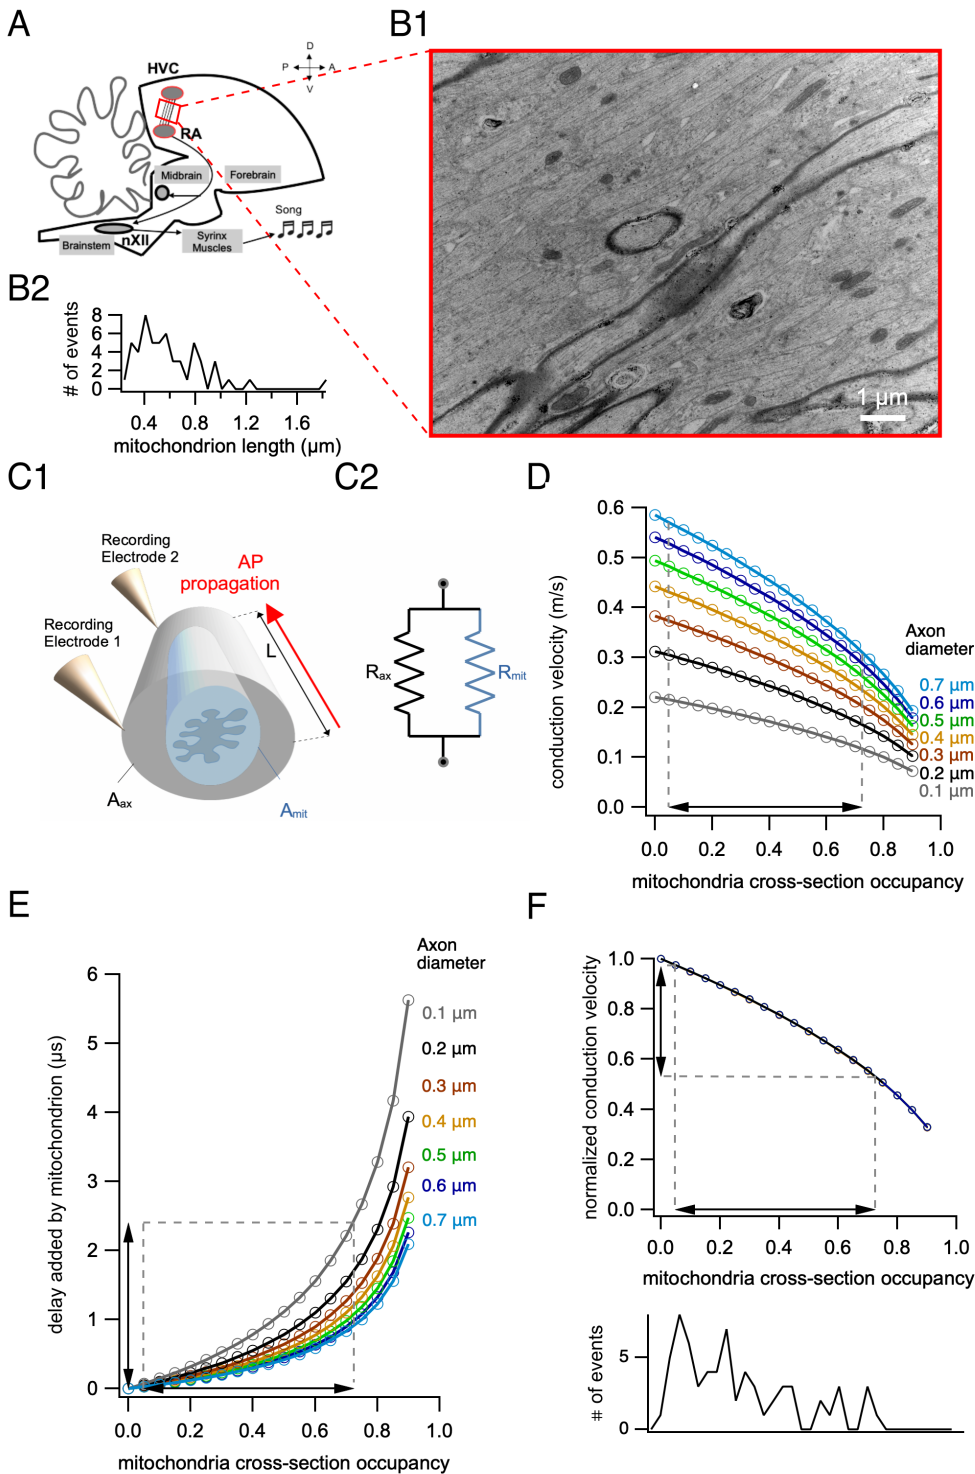

348  
349 **Figure 2. Impact of a single mitochondrion on action potential conduction velocity.** **A.**  
350 Schematic of the pathway between HVC and RA. Modified from (Alcami et al. 2021). **B.**  
351 Longitudinal section of an axon bundle. Mitochondria length estimated from the major axis of  
352 an ellipse fit. **C1.** Schematic of the modeled section of an axon. Action potential propagation  
353 was modeled along a cylinder of 0.6  $\mu\text{m}$  in length (L) and conduction speed measured  
354 between the two extremes of the cylinder. **C2.** Equivalent circuit of the axial component used



355 in our model. **D.** Action potential conduction velocity decreases for cylinders containing  
356 mitochondria relative to an axon free of mitochondria, as a function of cross-sectional  
357 mitochondrial occupancy of the axon for different axon diameters. The range of cross-section  
358 occupancies measured in our data is indicated with a dashed line. **E.** Action potential latency  
359 increases for cylinders containing mitochondria relative to an axon free of mitochondria, as a  
360 function of cross-sectional mitochondrial occupancy of the axon. The range of cross-section  
361 occupancies measured in our data is indicated with a dashed line. **F.** Top, the same functions  
362 normalized to a mitochondria-free axon overlapped for all diameters. Bottom, histogram of  
363 measured cross-sectional occupancies. The corresponding range is marked with dashed  
364 lines on the top graph.

365

366 That is, when conduction velocity was normalized to that of the mitochondrion-free  
367 axon for each diameter, the relative decrease of conduction velocity was similar for all the  
368 diameters. This observation is consistent with the prediction that the conduction velocity of an  
369 unmyelinated axon is proportional to its (*diameter*)<sup>½</sup>, so for two axons 1 and 2 with the same  
370 underlying biophysical properties:

371 
$$v_2/v_1 = c(d_2/d_1)^{1/2} \text{ [Equation 7]},$$

372 where  $v_1$ ,  $d_1$  and  $v_2$ ,  $d_2$  are the conduction velocity and diameter of axon 1 and axon 2,  
373 respectively and  $c$  is a constant (Hodgkin and Huxley 1952). Thus, for the same coverage for  
374 two axons with different velocities, their velocity ratio would be scalable by a constant  
375  $c(d_2/d_1)^{1/2}$ . In other words, the impact of mitochondrial coverage relative to the mitochondria-  
376 free axon normalizes to the conduction speed for each axon size, and is therefore  
377 comparable in relative magnitude.

378

### 379 **Longitudinal coverage of axons by mitochondria**

380 The overall impact of mitochondria on the conduction velocity along the pathway will depend  
381 on the fraction of the axon length that contains mitochondria. We estimated the average  
382 longitudinal coverage of the axon by mitochondria used in our simulations from electron  
383 micrographs with the following equation:

384 
$$\text{Total Volumetric Occupancy} = \text{Cross-sectional Occupancy} * \text{Longitudinal Coverage}$$
  
385 
$$\text{[Equation 8]}$$

386 where *total volumetric occupancy* is the total fraction of the volume of non-myelinated axons  
387 in the micrograph occupied by mitochondria, *longitudinal coverage* is the fraction of axon  
388 length covered by mitochondria in the longitudinal section and *cross-sectional occupancy* is  
389 the fraction of axonal cross-section area covered by mitochondria as measured in Fig.1.

390 Hence, the total volumetric occupancy is proportional to the cross-sectional mitochondrial  
391 occupancy and to the average longitudinal mitochondrial coverage.

392 We measured the fraction of the non-myelinated fibers occupied by mitochondria in an  
393 electron micrograph from a longitudinal bundle ( $185.50 \mu\text{m}^2$  area \*0.06 thickness), the  
394 resulting total volumetric occupancy equalled 0.0377, that is,  $\sim 3.8\%$ . Hence, the total  
395 occupancy in HVC<sub>RA</sub> axons was in the same range as previously measured average total  
396 occupancy of axons by mitochondria in mammals, e.g.  $\sim 2\%$  in cerebellar parallel fibers and  
397 optic nerve axons,  $\sim 8\%$  in olfactory receptor neurons,  $\sim 6\%$  in the fornix,  $\sim 4\%$  in retinal  
398 axons and;  $\sim 3$  to  $9\%$  in different axons of hippocampal axons (Perge et al. 2012; Perge et al.  
399 2009; Faitg et al. 2021). Applying equation 8, longitudinal coverage = total occupancy/ cross-  
400 sectional occupancy =  $3.77/29.1 = 0.130$  or  $13\%$  on average.

401

#### 402 **Mitochondrial increase in latency of action potential propagation between HVC and RA** 403 **and its dependence on mitochondrial longitudinal coverage**

404 We next investigated the impact of mitochondria on conduction velocity as action  
405 potentials propagate from HVC to RA. The longitudinal coverage of axons by mitochondria  
406 was varied in these simulations from 2 to 30%, in agreement with the 13% occupancy  
407 measured above as well as that of axons measured in other systems, and the known  
408 changes of mitochondrial coverage with age, injury and regeneration and activity (Faitg et al.  
409 2021; Perge et al. 2009; Perge et al. 2012; Han, Baig, and Hammarlund 2016). The distance  
410 travelled by axons in a sagittal plane between HVC and RA was approximately 3 mm (Fig.  
411 3B), a similar estimation to that done previously in another songbird, the zebra finch (Egger et  
412 al. 2020). Note that the distance travelled by axons may be larger when linking distal parts of  
413 HVC and RA that are not in the same sagittal plane.

414 The presence of mitochondria relative to 'Gedankenexperiment' mitochondria-free  
415 axons changed the amount of time required for an action potential to reach the RA for  
416 representative axonal sizes: for a typical 25% cross-sectional mitochondrial occupancy of a  
417  $0.4 \mu\text{m}$  non-myelinated diameter axon with 12.5% longitudinal coverage, action potentials  
418 accumulated an additional delay of 0.14 ms in their arrival to RA (Fig.3 E2) and a decrease in  
419 average conduction velocity of 2.1%. For smaller fibers with  $0.2 \mu\text{m}$  in diameter, a typical 60%  
420 cross-sectional mitochondrial occupancy and 12.5% coverage, action potentials are delayed



421 by 0.84 ms by mitochondria and have a decrease in average conduction velocity by 8.0%.  
422 Although the amount of additional delay depended on the axon diameter, the relative  
423 decrease in conduction velocity was similar for all diameters examined.

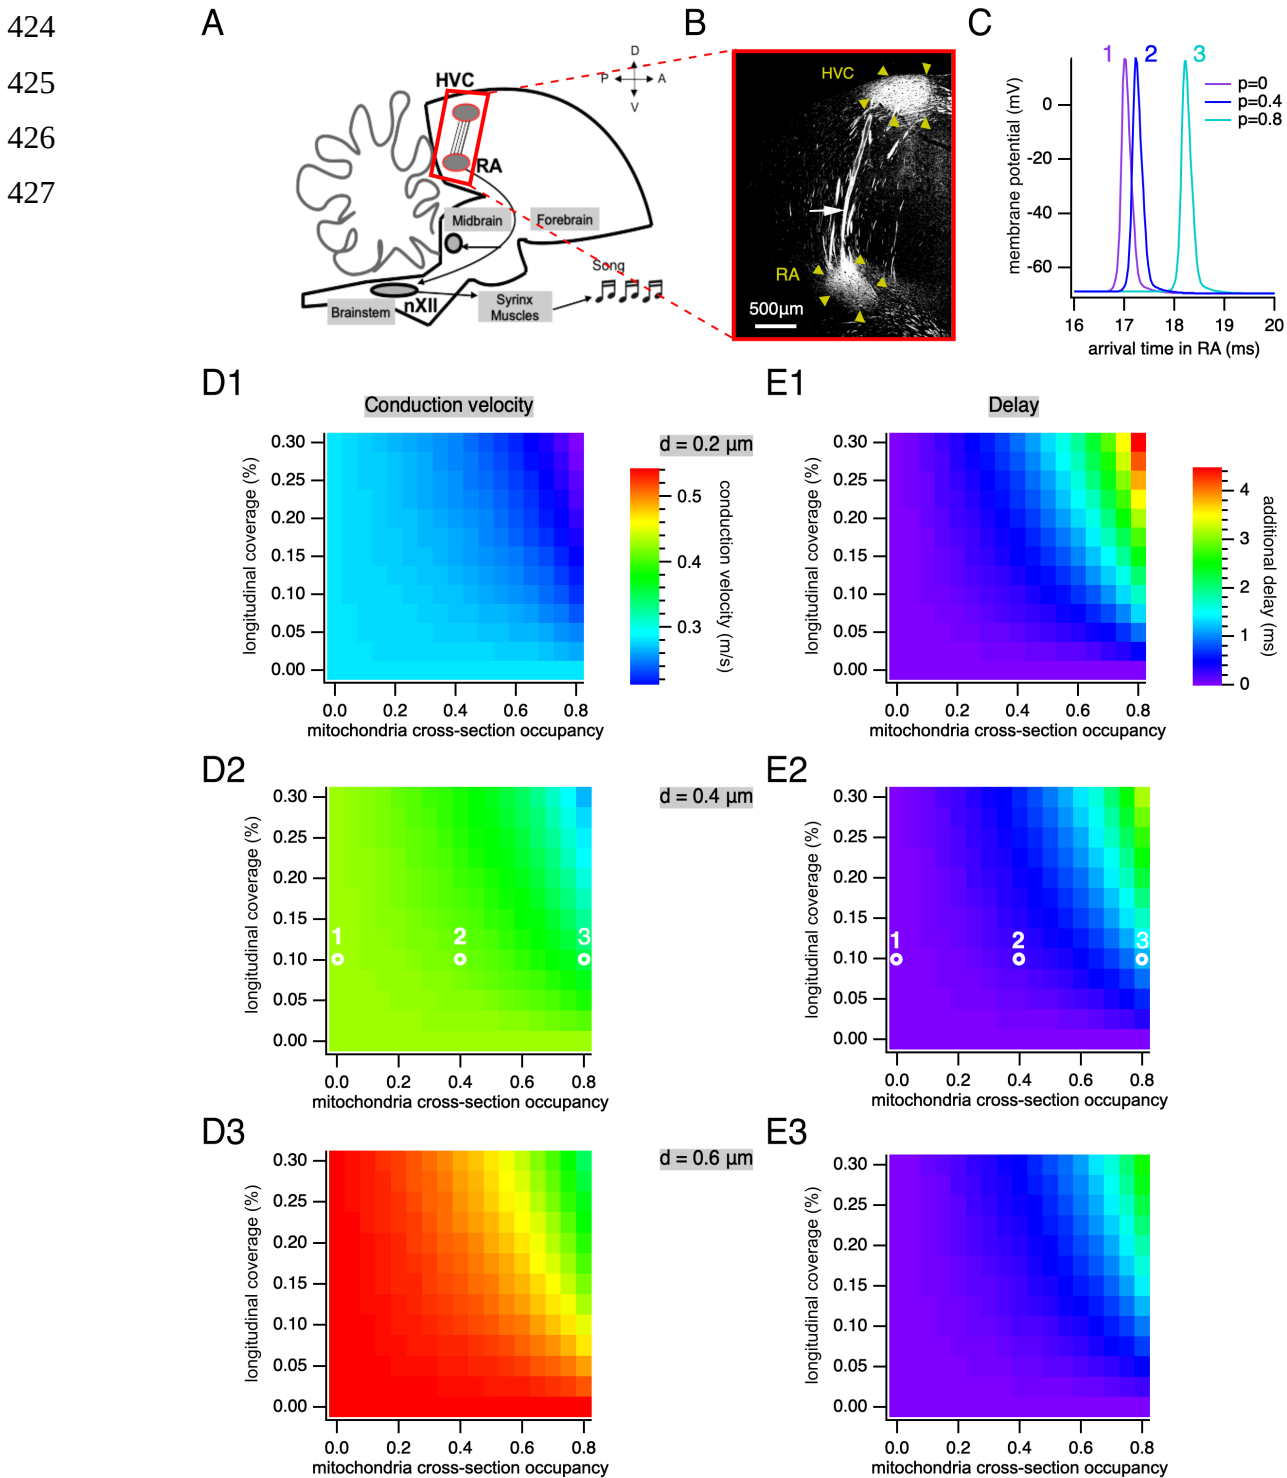

428 **Figure 3. Action potential propagation between HVC and RA and influence of**  
429 **mitochondria density. A.** Schematic of the pathway along which we modeled the

430 propagation of action potentials, between HVC and RA. Modified from (Alcami et al. 2021). **B.**  
431 Immunostaining against the neurofilament heavy chain, which makes it possible to visualize  
432 the pathway formed by axons running in bundles between HVC and RA (both indicated by  
433 yellow arrowheads). The white arrow indicates an axon bundle. **C.** Example showing action  
434 potentials after stimulus onset with varying mitochondrial occupancy in 0.4  $\mu\text{m}$  diameter  
435 axons with 10% longitudinal coverage at the RA ( $p = 0$  in purple,  $p = 0.4$  in dark blue and  $p =$   
436  $0.8$  in turquoise). **D1.** Action potential conduction velocity as a function of longitudinal  
437 coverage and mitochondria cross-section occupancy for axons of a diameter of 0.2  $\mu\text{m}$ . **D2.**  
438 Same as D1 for 0.4  $\mu\text{m}$ . White circles indicate the parameters of action potentials shown in C.  
439 **D3.** Same as D1 for 0.6  $\mu\text{m}$ . **E1.** Additional delay of action potential arrival in RA a function of  
440 longitudinal coverage and mitochondria cross-section occupancy for axons of a diameter of  
441 0.2  $\mu\text{m}$ . **E2.** Same as E1 for 0.4  $\mu\text{m}$ . White circles indicate the parameters of action potentials  
442 shown in C. **E3.** Same as E1 for 0.6  $\mu\text{m}$ .

#### 444 Mitochondria induce anisotropic propagation of action potentials

445 The decrease in average conduction velocity along the pathway due to mitochondrial cross-  
446 sectional occupancy and longitudinal coverage is composed of small slow-downs as the  
447 action potential passes each individual mitochondrion. The amount of this local decrease  
448 depends on the properties of the mitochondrion. Hence the propagation velocity along an  
449 axon with constant diameter and biophysical properties is not expected to be constant but to  
450 vary as mitochondria are encountered.

A

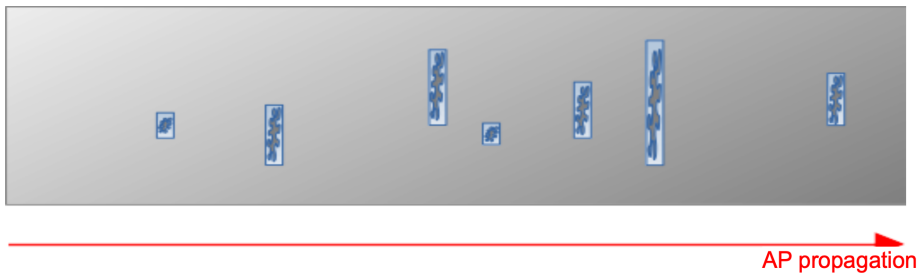

B

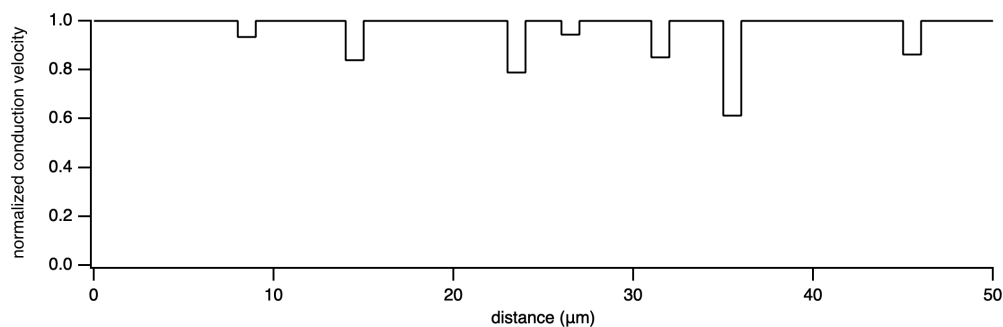

451 **Figure 4. Model of anisotropic propagation of action potentials along axons.** Schematic  
452 diagram illustrating the anisotropic propagation of action potentials along axons. **A.** Axon  
453

454 where the axon diameter has been disproportionately enlarged to accommodate the accurate  
455 cross section occupied by representative mitochondria. **B.** Simulation. Due to the presence of  
456 mitochondria occupying part of the axonal volume, action potential propagation is locally  
457 delayed. Mitochondria have been drawn in panel A from a 0.3  $\mu\text{m}$  diameter axon with 14%  
458 length containing 1  $\mu\text{m}$  long mitochondria. The cross-sectional occupancy  $p$  was drawn from  
459 a normal distribution with mean 0.3 and standard deviation 0.1.

460

461 Figure 4 shows an example of this anisotropy in action potential propagation in a  
462 simulated 0.3  $\mu\text{m}$  diameter axon with 14% of the length containing 1  $\mu\text{m}$  long mitochondria.  
463 The cross-sectional occupancy for each mitochondrion was drawn from a normal distribution  
464 with mean 0.3 and standard deviation 0.1. The figure shows the decrease in conduction  
465 velocity for each mitochondrion but doesn't resolve the transition from mitochondrion free to  
466 mitochondrion containing axon sections.

467

## 468 **Discussion**

469 We present measurements of the size and density of mitochondria in unmyelinated axons  
470 from electron micrographs of axon bundles of the premotor pathway linking song nuclei HVC  
471 and RA from canaries. We found that mitochondria-containing axons range from ~200 to 700  
472 nm diameter. The canary motor pathway contains unmyelinated axons of small diameters  
473 that co-exist with myelinated axons in the bundles of axons running between song nuclei HVC  
474 and RA, as previously shown in the zebra finch (Egger et al. 2020). We found that the cross-  
475 sectional occupancy of axons by mitochondria depends on the axon diameter: occupancy is  
476 larger for smaller diameter axons.

477 Due to this reduction in the axoplasm by mitochondrial occupancy, our modeling  
478 showed that action potentials propagate anisotropically in axons, resulting in a local slow  
479 down of action potential propagation to about half its original speed for largest mitochondria-  
480 to-axon area ratios typically found in small axons. Whereas anisotropy of action potential  
481 conduction has been reported in myelinated fibers as 'saltatory' conduction, whereby  
482 conduction speed increases at the internodes, action potentials have been assumed to  
483 propagate homogeneously along a non-myelinated axonal branch of constant diameter.  
484 However we found that each time a propagating action potential meets a mitochondrion, the  
485 instantaneous conduction velocity can drop by 16% of its original value for an average 29%  
486 cross-sectional occupancy, and by up to 47% for the largest mitochondrial cross sectional

487 occupancies (Fig. 2F). Interestingly, this phenomenon does not affect all axons alike, given  
488 the modest scaling of mitochondrial size with axon size. Indeed, mitochondrial cross-section  
489 occupancy shows an interesting phenomenon: small axons are more prone to a larger cross-  
490 section coverage, and thereby, to a larger local slow down of action potentials per  
491 mitochondrion. Why do mitochondria modestly scale with axon diameter? We can speculate  
492 that the size of mitochondria may be constrained by their evolutionary origin and their co-  
493 evolution within eucariotic cellular structures (Sagan 1967).

494         The non-uniform propagation of action potentials due to mitochondria may lead to  
495 additional nonlinearities when combined with features such as axonal tree branching and  
496 impedance mismatches (Manor, Koch, and Segev 1991), ion channel clustering, or leakage  
497 through axonal gap junctions (Alcami and El Hady 2019; Alcamí and Pereda 2019). Note that  
498 contrary to changes in axial resistance that also concomitantly change the surface of the  
499 plasma membrane, mitochondria locally change axial resistance without affecting plasma  
500 membrane capacitance or resistance.

501         The small axons found in the songbird premotor pathway linking HVC and RA are  
502 known to conduct a neural code that relies on submillisecond precision (Hahnloser,  
503 Kozhevnikov, and Fee 2002). Mitochondrial delays, that we estimate to be in the same time  
504 frame, thus likely constitute a design feature that the system has to take into consideration for  
505 its computations. Indeed, although submillisecond precision in the coordination of cell  
506 assemblies encoding song is necessary, a slight delay in conduction speed that delays the  
507 arrival of action potentials in RA within the millisecond range seems to pose a constraint that  
508 the system builds upon. Other features may constitute a stronger selective pressure to keep  
509 small unmyelinated axons in this pathway in the songbird brain. These may be related to  
510 miniaturization and volumetric constraints (Perge et al. 2009). However, the fast speed of  
511 conduction in other systems that strongly rely on submillisecond and fast conduction may be  
512 subject to a strong pressure whereby mitochondria-induced slowing down could not be  
513 tolerated since it would significantly alter the neural code necessary for survival. An example  
514 of such system can be found in the auditory system, fine tuned for speed (Taschenberger and  
515 von Gersdorff 2000), which is formed by large myelinated axons from cells whose somata are  
516 found in the cochlear nucleus and whose axons project to the main nucleus of the trapezoid  
517 body (Grothe, Pecka, and McAlpine 2010). Since slowing down by mitochondria can be

518 mostly overcome by larger axons, for which mitochondria scale sublinearly with their large  
519 size, and by myelination, which will favor a fast propagation of action potentials along  
520 neuronal and myelin membranes by their faster capacitive loading (Castelfranco and Hartline  
521 2015; Alcami and El Hady 2019; Cohen et al. 2020), this combination of large and myelinated  
522 axons seems to be a solution that reduces action potential conduction delays.

523 Our results point towards an interesting paradox: on the one hand, energy, which as a  
524 first approximation can be estimated to be proportional to mitochondrial volume, is required to  
525 sustain axonal function, and in particular action potential generation and propagation  
526 (Borowsky and Collins 1989; Perge et al. 2009). Moreover, generating action potentials at  
527 higher frequencies leads to higher information encoding axons and likely requires larger  
528 mitochondrial volumes along axons (Perge et al. 2009). On the other hand, generating energy  
529 likely leads to a larger mitochondrial occupancy of the axoplasm, and thereby, to a slower  
530 conduction velocity. Thus, we postulate that there is a tradeoff between energy requirements  
531 for information coding by axons and conduction velocity. Interestingly, changes in metabolic  
532 demand or efficiency could lead to plasticity in mitochondria density and paradoxically to  
533 slowing down action potentials as a cost for higher energy supply.

534 Our computational model only explores resistive changes in axial impedance, leaving  
535 aside contributions of mitochondrial capacitance. Our estimate of mitochondrial resistivity was  
536 consistent with the measurements of mitochondrial resistance of Jonas et al. (1999)(Jonas,  
537 Buchanan, and Kaczmarek 1999) and is likely to be an underestimate because of our  
538 assumptions about the dimensions of the resistor. A smaller resistor length would give a  
539 larger resistivity. However, increasing the mitochondrial resistivity would have only a minor  
540 effect on the results since the combined resistivity of the axoplasm and the mitochondrion  
541 saturates for larger values. The charge of mitochondrial capacitance seems to play a  
542 negligible contribution to the axial impedance change along the axon, since (Padmaraj et al.  
543 2014) found little change in measured mitochondrial impedance for signals up to 10kHz,  
544 which is beyond neuronal computational time-scales, justifying our assumption. Finally, we  
545 assume a simple, cylindrical shape for a mitochondrion, which agrees with the low complexity  
546 index of mitochondria in hippocampal axons reported in (Faitg et al. 2021).

547 How widespread is the phenomenon reported here in axons across phylogeny? First,  
548 long small diameter axons are widely found in mammals (Perge et al. 2009; Braitenberg

1991; Wang et al. 2008) including humans (Aboitiz et al. 1992). Second, axonal occupancy by mitochondria seems to be in the same range as reported here in both invertebrates and vertebrates (Phelps et al. 2021; Perge et al. 2009), suggesting that the phenomenon is widespread across the phylogeny. If we consider the ~ 0.1-0.8 ms delays in action potential propagation expected for 3mm long axons, and how these delays may generalize to axons one to two orders of magnitude longer, we would expect cumulated latencies in the millisecond to tens of milliseconds range, e.g. in the long non-myelinated fibers found in the human brain (Aboitiz et al. 1992). Remarkably, mitochondria show large levels of plasticity with activity age or disease (Faitg et al. 2021; Han, Baig, and Hammarlund 2016). It would be interesting to consider changes in action potential conduction velocity induced by these previously-reported changes in mitochondrial coverage.

The presence of additional organelles may analogously further contribute to delaying action potential conduction and increase the impact of organelles, here solely reduced to mitochondria. Finally, it would be interesting to model the impact of mitochondria in dendrites, which show a larger total mitochondrial occupancy than axons, e.g. in neocortical pyramidal cells (Lewis et al. 2018). There, mitochondrial occupancy may also interact with the propagation of synaptic events and dendritic spikes (London and Häusser 2005).

So far, cable theory has focused on biological cables free of organelles (Meunier and Segev 2001). Including intracellular organelles will add to our understanding of electrical signal propagation along biological cables found in neurons as well as in other cell types. Introducing mitochondria and more generally intracellular organelles as a structural design would allow to accurately model the propagation of action potentials, and more generally, of electrical signals.

## References

- Aboitiz, Francisco, Arnold B. Scheibel, Robin S. Fisher, and Eran Zaidel. 1992. 'Fiber composition of the human corpus callosum', *Brain Research*, 598: 143-53.
- Akemann, Walther, and Thomas Knöpfel. 2006. 'Interaction of Kv3 Potassium Channels and Resurgent Sodium Current Influences the Rate of Spontaneous Firing of Purkinje Neurons', *The Journal of Neuroscience*, 26: 4602-12.
- Alcami, Pepe, and Ahmed El Hady. 2019. 'Axonal Computations', *Frontiers in Cellular*



- 580 *Neuroscience*, 13.
- 581 Alcamí, Pepe, and Alberto E. Pereda. 2019. 'Beyond plasticity: the dynamic impact of  
582 electrical synapses on neural circuits', *Nature Reviews Neuroscience*, 20: 253-71.
- 583 Alcamí, Pepe, Santhosh Totagera, Nina Sohnius-Wilhelmi, Stefan Leitner, Benedikt Grothe,  
584 Carolina Frankl-Vilches, and Manfred Gahr. 2021. 'Extensive GJD2 Expression in the  
585 Song Motor Pathway Reveals the Extent of Electrical Synapses in the Songbird Brain',  
586 *Biology*, 10: 1099.
- 587 Borowsky, Iris Wagman, and Robert C. Collins. 1989. 'Metabolic anatomy of brain: A  
588 comparison of regional capillary density, glucose metabolism, and enzyme activities',  
589 *Journal of Comparative Neurology*, 288: 401-13.
- 590 Braitenberg, Valentino; Schüz, Almut. 1991. 'Anatomy of the Cortex  
591 Statistics and Geometry', *Springer Berlin, Heidelberg*.
- 592 Carnevale, Nicholas T., and Michael L. Hines. 2006. *The NEURON Book* (Cambridge  
593 University Press: Cambridge).
- 594 Castelfranco, A. M., and D. K. Hartline. 2015. 'The evolution of vertebrate and invertebrate  
595 myelin: a theoretical computational study', *Journal of Computational Neuroscience*, 38:  
596 521-38.
- 597 Cohen, Charles C. H., Marko A. Popovic, Jan Klooster, Marie-Theres Weil, Wiebke Möbius,  
598 Klaus-Armin Nave, and Maarten H. P. Kole. 2020. 'Saltatory Conduction along  
599 Myelinated Axons Involves a Periaxonal Nanocircuit', *Cell*, 180: 311-22.e15.
- 600 Deutsch, S. 1969. 'The Maximization of Nerve Conduction Velocity', *IEEE Transactions on*  
601 *Systems Science and Cybernetics*, 5: 86-91.
- 602 Egger, Robert, Yevhen Tupikov, Margot Elmaleh, Kalman A. Katlowitz, Sam E. Benezra,  
603 Michel A. Picardo, Felix Moll, Jörgen Kornfeld, Dezhe Z. Jin, and Michael A. Long.  
604 2020. 'Local Axonal Conduction Shapes the Spatiotemporal Properties of Neural  
605 Sequences', *Cell*, 183: 537-48.e12.
- 606 Faitg, Julie, Clay Lacefield, Tracey Davey, Kathryn White, Ross Laws, Stylianos Kosmidis,  
607 Amy K. Reeve, Eric R. Kandel, Amy E. Vincent, and Martin Picard. 2021. '3D neuronal  
608 mitochondrial morphology in axons, dendrites, and somata of the aging mouse  
609 hippocampus', *Cell Reports*, 36.
- 610 Grothe, Benedikt, Michael Pecka, and David McAlpine. 2010. 'Mechanisms of Sound



- 611           Localization in Mammals', *Physiological Reviews*, 90: 983-1012.
- 612 Hahnloser, R. H. R., A. A. Kozhevnikov, and M. S. Fee. 2002. 'An ultra-sparse code underlies  
613           the generation of neural sequences in a songbird', *Nature*, 419: 65.
- 614 Hahnloser, Richard H. R., Alexay A. Kozhevnikov, and Michale S. Fee. 2006. 'Sleep-Related  
615           Neural Activity in a Premotor and a Basal-Ganglia Pathway of the Songbird', *Journal of*  
616           *Neurophysiology*, 96: 794-812.
- 617 Han, Sung Min, Huma S. Baig, and Marc Hammarlund. 2016. 'Mitochondria Localize to  
618           Injured Axons to Support Regeneration', *Neuron*, 92: 1308-23.
- 619 Harris, Julia J., and David Attwell. 2012. 'The Energetics of CNS White Matter', *The Journal of*  
620           *Neuroscience*, 32: 356-71.
- 621 Hines, M. L., and N. T. Carnevale. 1997. 'The NEURON Simulation Environment', *Neural*  
622           *Computation*, 9: 1179-209.
- 623 Hodgkin, A. L., and A. F. Huxley. 1952. 'A quantitative description of membrane current and its  
624           application to conduction and excitation in nerve', *The Journal of Physiology*, 117: 500-  
625           44.
- 626 Jack, J. B., Denis Noble, and Richard W. Tsien. 1975. "Electric current flow in excitable cells."  
627           In.
- 628 Jonas, Elizabeth A., JoAnn Buchanan, and Leonard K. Kaczmarek. 1999. 'Prolonged  
629           Activation of Mitochondrial Conductances During Synaptic Transmission', *Science*,  
630           286: 1347-50.
- 631 Lewis, Tommy L., Seok-Kyu Kwon, Annie Lee, Reuben Shaw, and Franck Polleux. 2018.  
632           'MFF-dependent mitochondrial fission regulates presynaptic release and axon  
633           branching by limiting axonal mitochondria size', *Nature Communications*, 9: 5008.
- 634 London, Michael, and Michael Häusser. 2005. 'Dendritic computation', *Annual Review of*  
635           *Neuroscience*, 28: 503-32.
- 636 Manor, Y., C. Koch, and I. Segev. 1991. 'Effect of geometrical irregularities on propagation  
637           delay in axonal trees', *Biophysical Journal*, 60: 1424-37.
- 638 Meunier, C., and I. Segev. 2001. 'Chapter 11 Neurones as physical objects: Structure,  
639           dynamics and function.' in F. Moss and S. Gielen (eds.), *Handbook of Biological*  
640           *Physics* (North-Holland).
- 641 Möbius, Wiebke, Benjamin Cooper, Walter A. Kaufmann, Cordelia Imig, Torben Ruhwedel,

- 642 Nicolas Snaidero, Aiman S. Saab, and Frédérique Varoquaux. 2010. 'Chapter 20 -  
643 Electron Microscopy of the Mouse Central Nervous System.' in Thomas Müller-  
644 Reichert (ed.), *Methods in Cell Biology* (Academic Press).
- 645 Ofer, Netanel, Orit Shefi, and Gur Yaari. 2020. 'Axonal Tree Morphology and Signal  
646 Propagation Dynamics Improve Interneuron Classification', *Neuroinformatics*, 18: 581-  
647 90.
- 648 Padmaraj, D., R. Pande, J. H. Miller, Jr., J. Wosik, and W. Zagodzdon-Wosik. 2014.  
649 'Mitochondrial membrane studies using impedance spectroscopy with parallel pH  
650 monitoring', *PLoS One*, 9: e101793.
- 651 Perge, János A., Kristin Koch, Robert Miller, Peter Sterling, and Vijay Balasubramanian. 2009.  
652 'How the Optic Nerve Allocates Space, Energy Capacity, and Information', *The Journal*  
653 *of Neuroscience*, 29: 7917-28.
- 654 Perge, János A., Jeremy E. Niven, Enrico Mugnaini, Vijay Balasubramanian, and Peter  
655 Sterling. 2012. 'Why Do Axons Differ in Caliber?', *The Journal of Neuroscience*, 32:  
656 626-38.
- 657 Phelps, Jasper S., David Grant Colburn Hildebrand, Brett J. Graham, Aaron T. Kuan, Logan  
658 A. Thomas, Tri M. Nguyen, Julia Buhmann, Anthony W. Azevedo, Anne Sustar, Sweta  
659 Agrawal, Mingguan Liu, Brendan L. Shanny, Jan Funke, John C. Tuthill, and Wei-  
660 Chung Allen Lee. 2021. 'Reconstruction of motor control circuits in adult *Drosophila*  
661 using automated transmission electron microscopy', *Cell*, 184: 759-74.e18.
- 662 Rushton, W. A. H. 1951. 'A theory of the effects of fibre size in medullated nerve', *The Journal*  
663 *of Physiology*, 115: 101-22.
- 664 Sagan, Lynn. 1967. 'On the origin of mitosing cells', *Journal of Theoretical Biology*, 14: 225-  
665 IN6.
- 666 Schmidt-Hieber, Christoph, and Josef Bischofberger. 2010. 'Fast Sodium Channel Gating  
667 Supports Localized and Efficient Axonal Action Potential Initiation', *The Journal of*  
668 *Neuroscience*, 30: 10233-42.
- 669 Seidl, Armin H., Edwin W Rubel, and David M. Harris. 2010. 'Mechanisms for Adjusting  
670 Interaural Time Differences to Achieve Binaural Coincidence Detection', *The Journal of*  
671 *Neuroscience*, 30: 70-80.
- 672 Sterling, Peter, and Simon Laughlin. 2015. *Principles of neural design*.

- 673 Taschenberger, Holger, and Henrike von Gersdorff. 2000. 'Fine-Tuning an Auditory Synapse  
674 for Speed and Fidelity: Developmental Changes in Presynaptic Waveform, EPSC  
675 Kinetics, and Synaptic Plasticity', *The Journal of Neuroscience*, 20: 9162-73.
- 676 Wang, Samuel S.-H., Jennifer R. Shultz, Mark J. Burish, Kimberly H. Harrison, Patrick R. Hof,  
677 Lex C. Towns, Matthew W. Wagers, and Krysta D. Wyatt. 2008. 'Functional Trade-Offs  
678 in White Matter Axonal Scaling', *The Journal of Neuroscience*, 28: 4047-56.
